# Supplementary material for: Morphological and Molecular Diversity among Pin Nematodes of the Genus Paratylenchus (Nematoda: Paratylenchidae) from Florida and Other Localities and Molecular Phylogeny of the Genus
Source: MDPI journal article supplement (doi:10.3390/plants12152770), 2023-07-26
Supplement: s1 [file s1]

Article

# Morphological and molecular diversity among pin nematodes of the genus *Paratylenchus* (Nematoda: Paratylenchidae) from Florida and other localities, and molecular phylogeny of the genus

Sergio Álvarez-Ortega <sup>1,\*</sup>, Sergei A. Subbotin <sup>2,3</sup>, Koon-Hui Wang <sup>4</sup>, Jason D. Stanley <sup>5</sup>, Silvia Vau <sup>5</sup>, William Crow <sup>6</sup> and Renato N. Inserra <sup>5</sup>

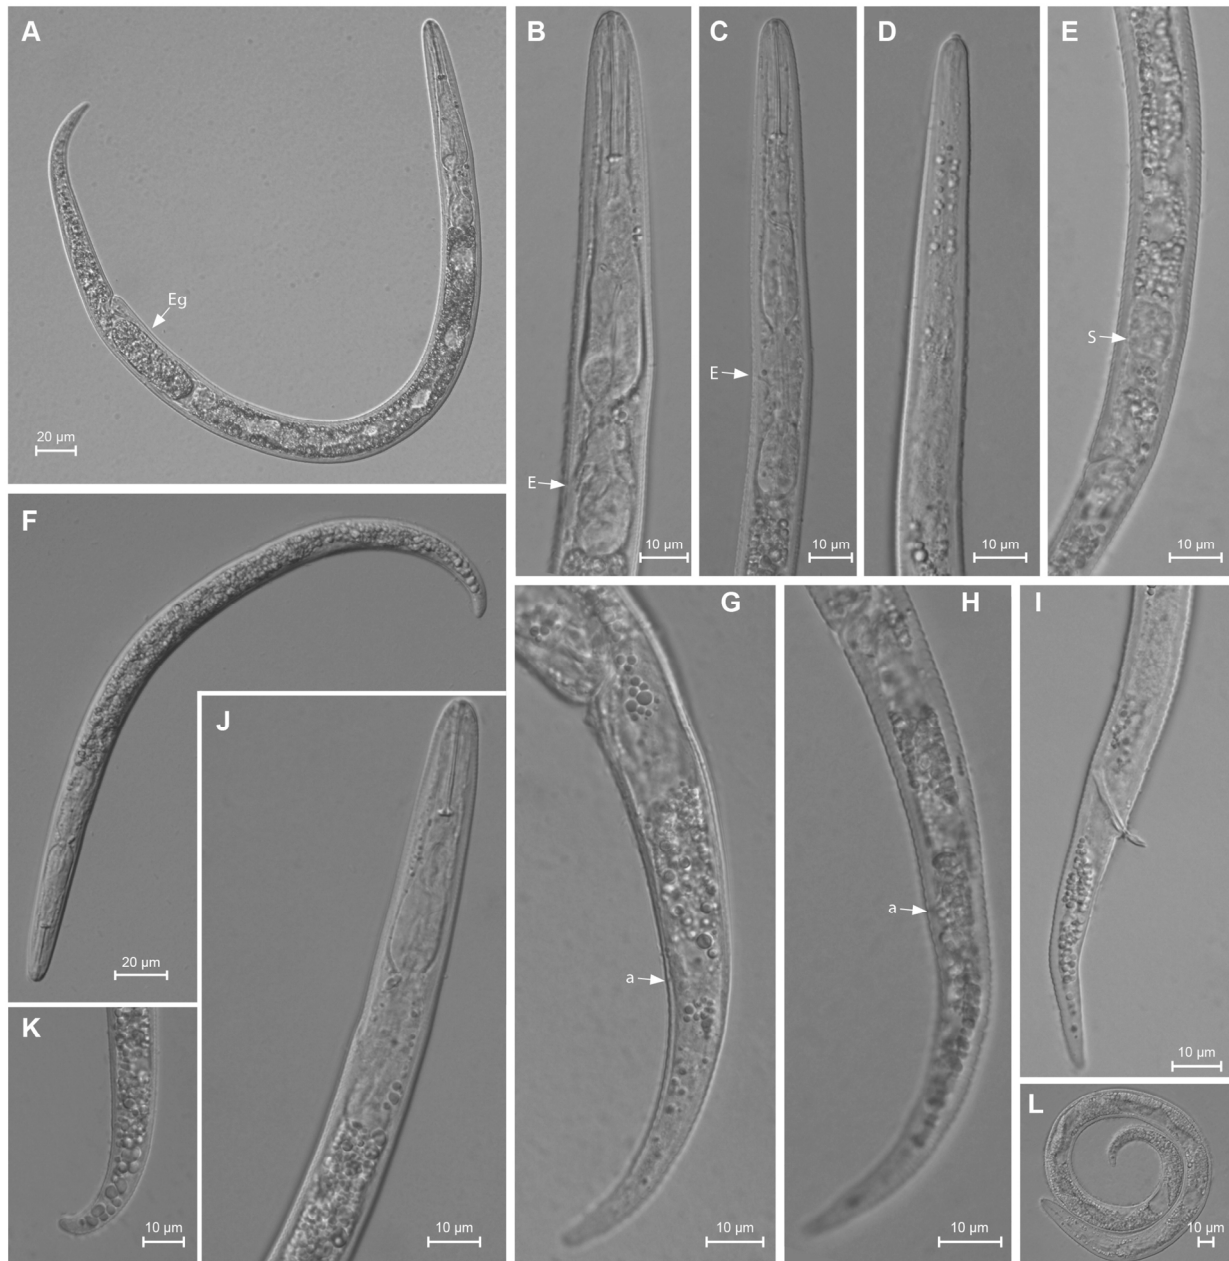

**Figure S1.** Light microscopic photos of *Paratylenchus* from *Zoysia* sp. in Florida (CD3651). A: Entire body of an egg-laying female. Note egg (arrowed); B, C: Anterior bodies of an egg-laying and immature female, respectively. Note excretory pore (arrowed); D: Anterior body of male; E: Vulvar region showing a prominent spermatheca (arrowed); F: Second stage juvenile entire body; G, H: Posterior bodies of egg-laying and immature female. Note anus (arrowed); I: posterior body of male; J: Anterior and posterior body of J2; K: Coiled fourth stage juvenile entire body.

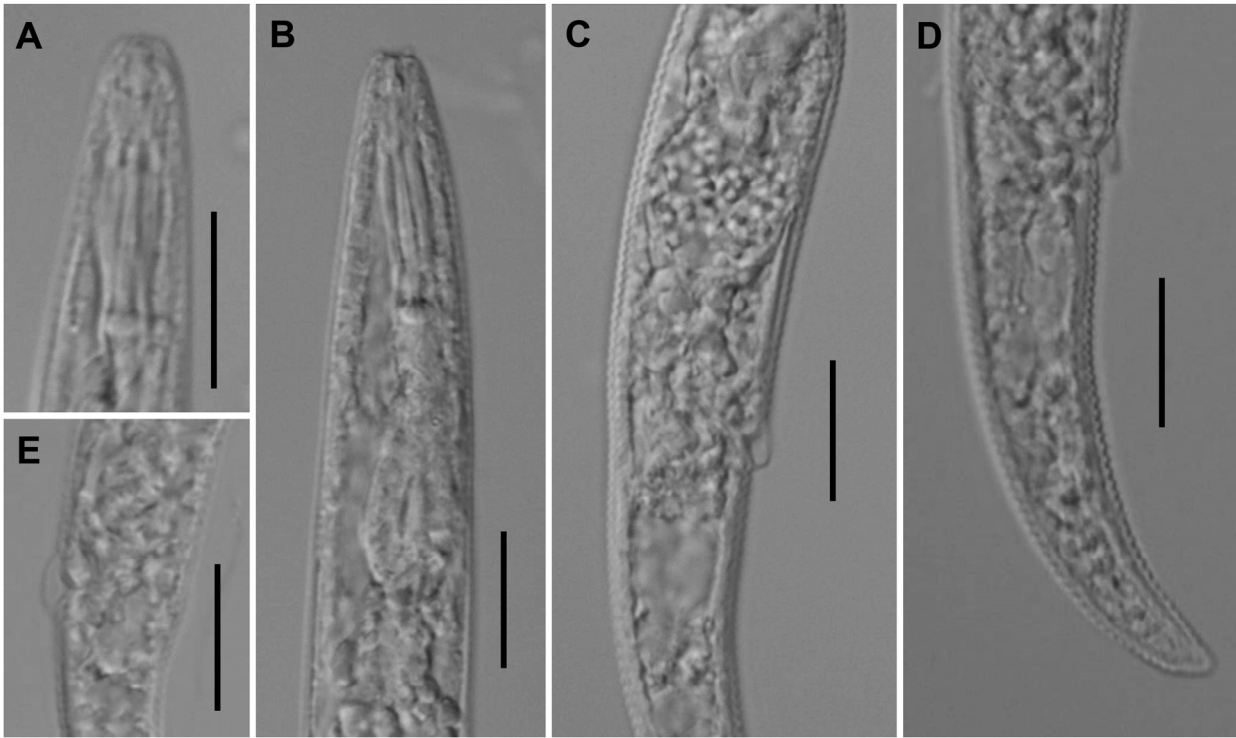

**Figure S2.** Light microscopic photos of *Paratylenchus minutus* (*P. shenzhenensis* syn. n.) female from *Coffea* sp. in Hawaii. A: Truncate lip region and stylet; B: Pharyngeal region; C: Posterior genital tract with large spermatheca; D: Posterior body; E: Vulvar region. (Scale bars = 10  $\mu\text{m}$ ).

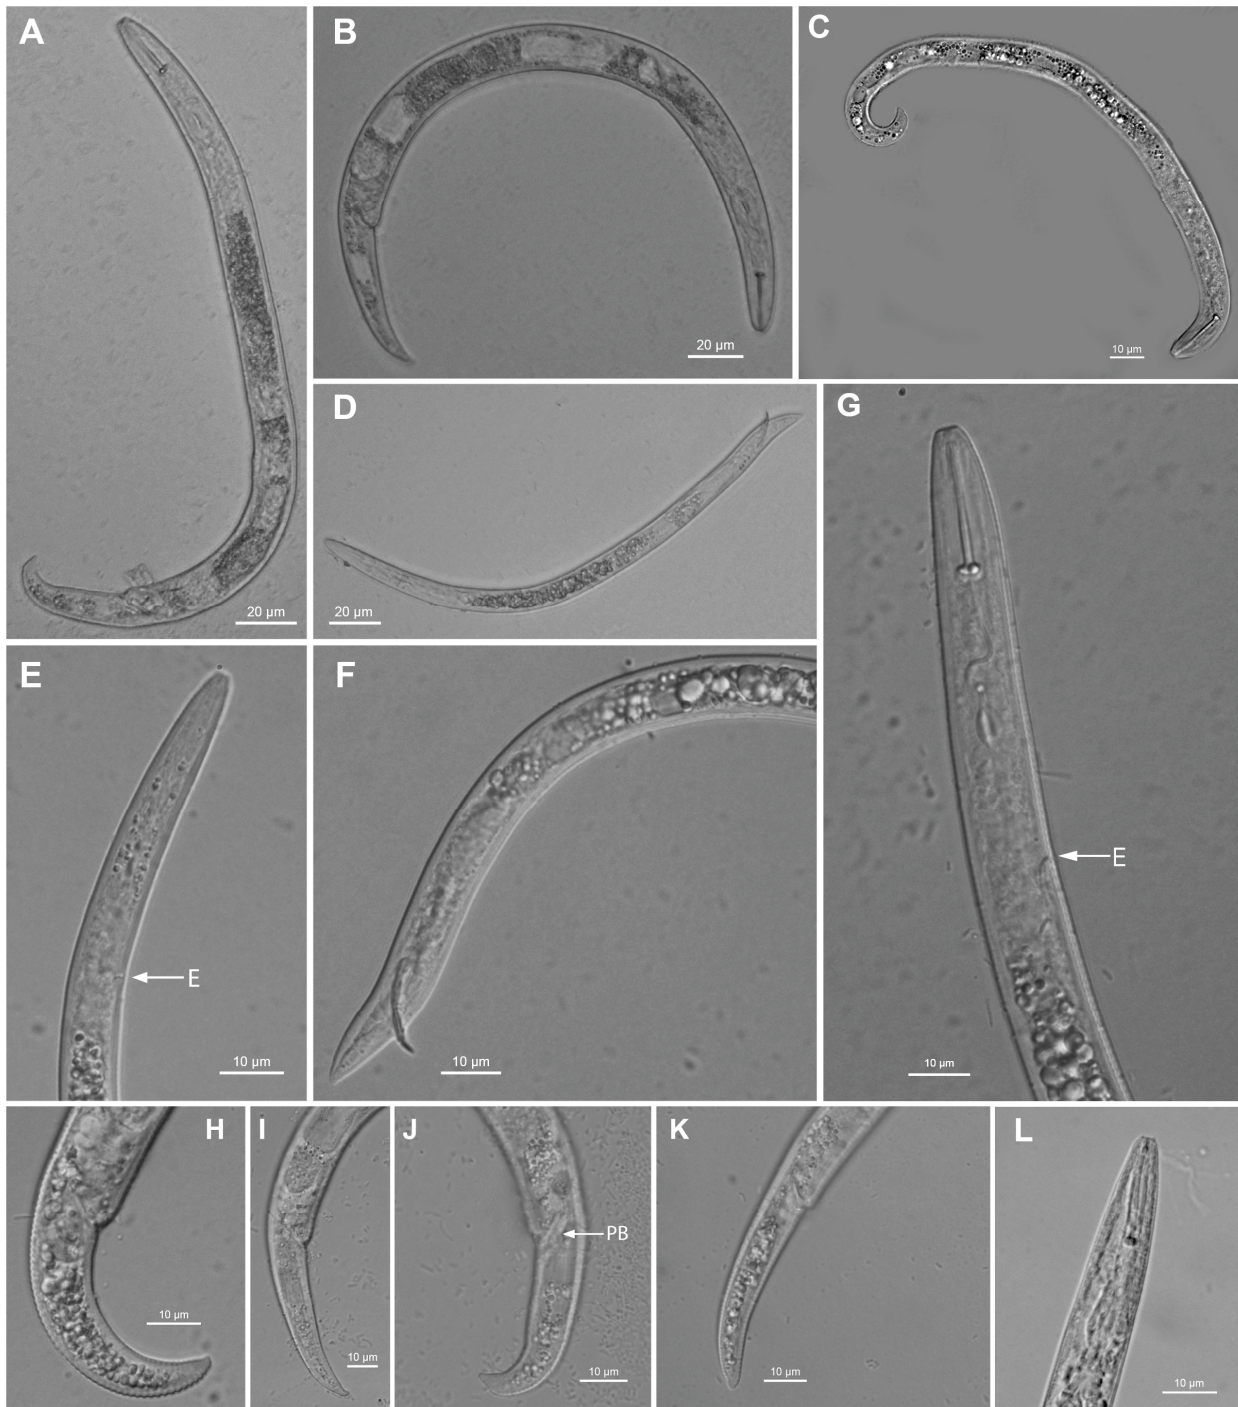

**Figure S3.** Light microscopic photos of *Paratylenchus minutus* (*P. shenzhenensis* syn. n.) female, male and fourth stage juvenile from *Hemerocallis* sp. in Florida. A, B: Entire body of female; C: Entire body of fourth stage juvenile; D: Entire body of male; E, F: Anterior and posterior body of male. Note excretory pore (arrowed); G: Pharyngeal region of female showing a truncate lip region and excretory pore (arrowed); H-K: Shape variations of female posterior body. Note large spermatheca and rudimentary post-vulvar branch (PB); L: Anterior body with truncate lip region of a female *P. minutus* from *Coffea* sp. in Hawaii is included for comparison.

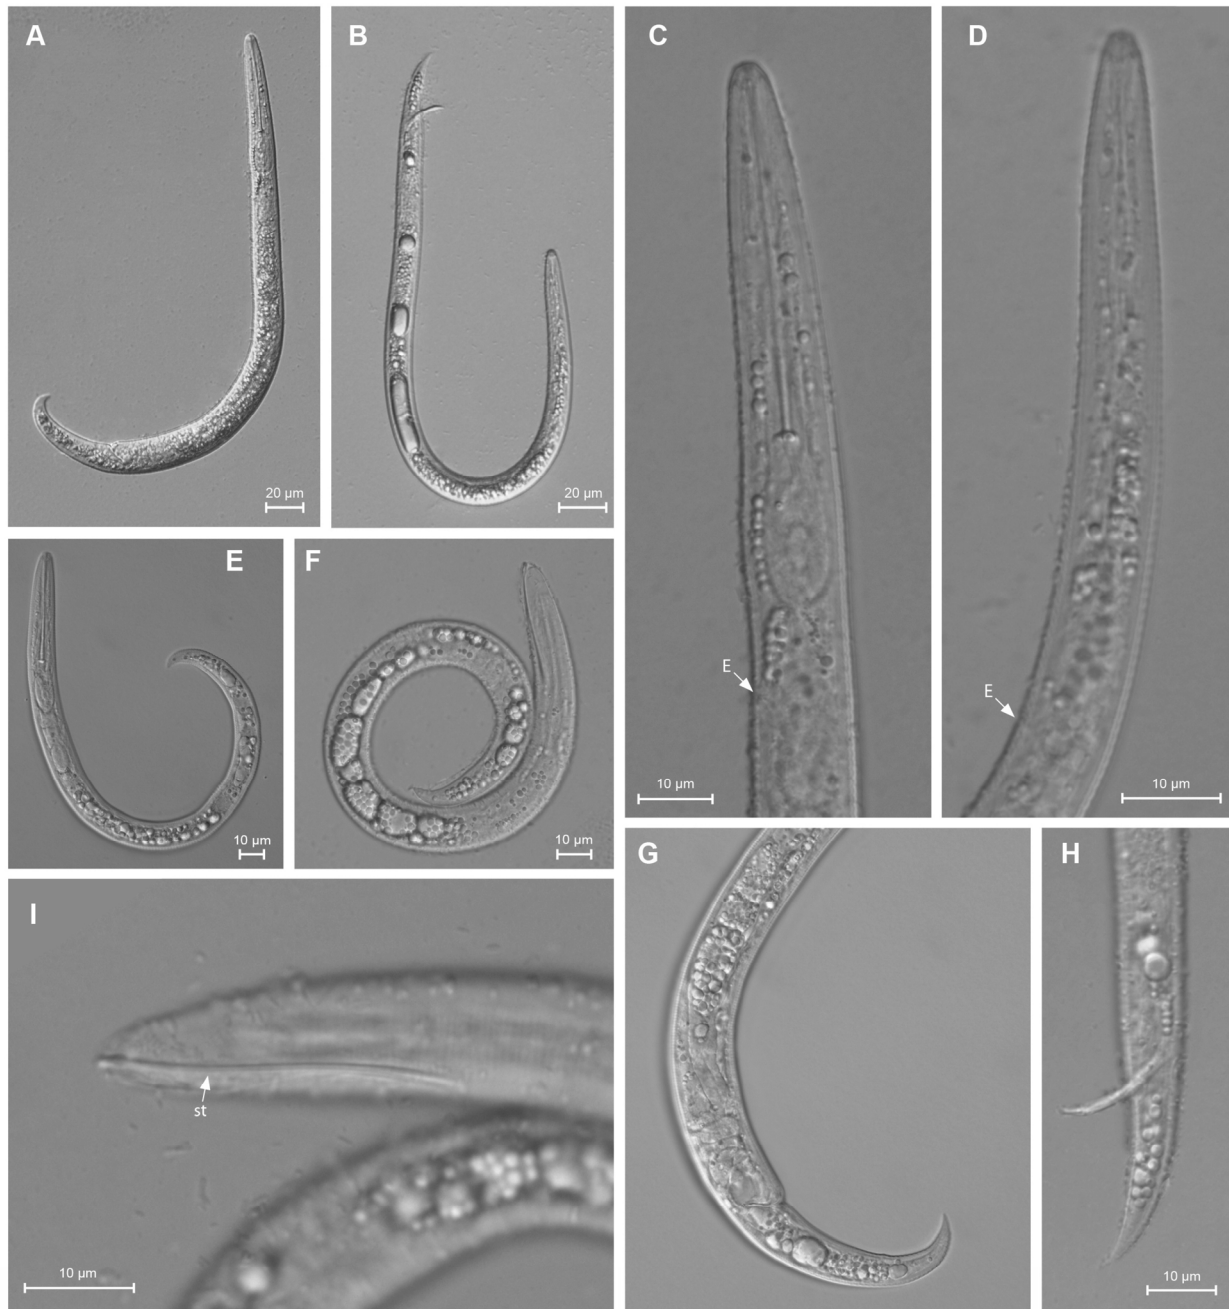

**Figure S4.** Light microscopic photos of *Paratylenchus straeleni* from *Quercus virginiana* in Florida. A, B: Female and male entire bodies, respectively; C, D: Female and male anterior bodies, respectively. Note excretory pore (arrowed); E: Second stage juvenile entire body; F: Fourth stage encased in the molted cuticles of J2 and J3; G: Posterior body of female showing oocytes and crustaformeria; H: Posterior body of male; I: Magnified figure F showing the molted stylet (arrowed) of J2 adhering to the molted cuticle.

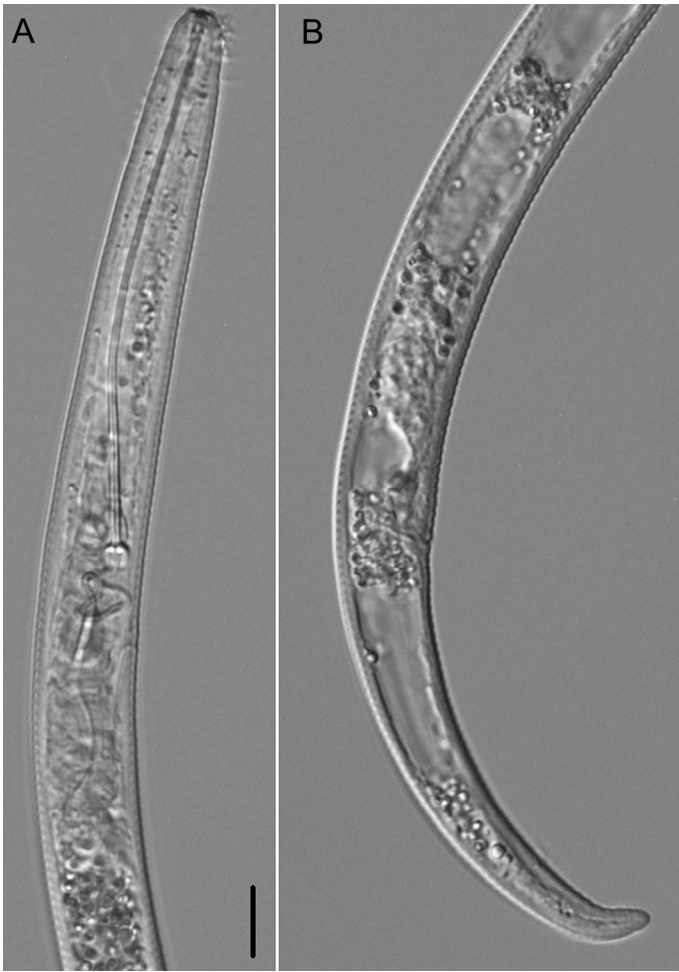

**Figure S5.** Light microscopic photos of *Paratylenchus* sp. FL2 female from palm in Florida. A: Anterior body region; B: Posterior body region (Scale bars = 10  $\mu$ m).

**Table S1.** Species of the pin nematodes reported in Florida.

| Species                                                                            | Morphological<br>or<br>morphometrical<br>characterization | Molecular<br>characterization | Identification<br>without any<br>published<br>morphological<br>datasets | Reference                                 |
|------------------------------------------------------------------------------------|-----------------------------------------------------------|-------------------------------|-------------------------------------------------------------------------|-------------------------------------------|
| <i>P. aciculus</i>                                                                 | -                                                         | -                             | +                                                                       | Raski (1976); Esser (1992); Lehman (2002) |
| <i>P. acti</i>                                                                     | +                                                         | +                             | -                                                                       | This study                                |
| <i>P. aculentus</i>                                                                | -                                                         | -                             | +                                                                       | Esser (1992); Lehman (2002)               |
| <i>P. alleni</i>                                                                   | -                                                         | -                             | +                                                                       | Esser (1992); Lehman (2002)               |
| <i>P. aquaticus</i>                                                                | +                                                         | +                             | -                                                                       | This study                                |
|                                                                                    | -                                                         | -                             | +                                                                       | Esser (1992); Lehman (2002)               |
| <i>P. audriellus</i>                                                               | -                                                         | -                             | +                                                                       | Esser (1992)                              |
| <i>P. besoeckianus</i>                                                             | -                                                         | -                             | +                                                                       | Lehman (2002)                             |
| <i>P. breviculus</i>                                                               | -                                                         | -                             | +                                                                       | Esser (1992); Lehman (2002)               |
| <i>P. colbrani</i>                                                                 | -                                                         | -                             | +                                                                       | Esser (1992); Lehman (2002)               |
| <i>P. costatus</i>                                                                 | -                                                         | -                             | +                                                                       | Lehman (2002)                             |
| <i>P. curvitatulus</i>                                                             | -                                                         | -                             | +                                                                       | Esser (1992); Lehman (2002)               |
| <i>P. dianthus</i>                                                                 | -                                                         | -                             | +                                                                       | Esser (1992); Lehman (2002)               |
| <i>P. elachistus</i>                                                               | +                                                         | -                             | -                                                                       | Steiner (1949); Raski (1975a)             |
| <i>P. elegans</i>                                                                  | +                                                         | -                             | -                                                                       | Raski (1962)                              |
| <i>P. enatus</i>                                                                   | -                                                         | -                             | +                                                                       | Lehman (2002)                             |
| <i>P. goldeni</i>                                                                  | +                                                         | +                             | -                                                                       | This study                                |
|                                                                                    | -                                                         | -                             | +                                                                       | Esser (1992); Lehman (2002)               |
| <i>P. goodeyi</i>                                                                  | -                                                         | -                             | +                                                                       | Esser (1992); Lehman (2002)               |
| <i>P. hamatus</i>                                                                  | -                                                         | -                             | +                                                                       | Esser (1992); Lehman (2002)               |
| <i>P. hawaiiensis</i> sp. n.                                                       | +                                                         | +                             | -                                                                       | This study                                |
|                                                                                    | -                                                         | +                             | +                                                                       | Singh <i>et al.</i> (2021)                |
| <i>P. holdemani</i>                                                                | -                                                         | -                             | +                                                                       | Lehman (2002)                             |
| <i>P. leioderms</i>                                                                | -                                                         | -                             | +                                                                       | Esser (1992); Lehman (2002)               |
| <i>P. leptos</i>                                                                   | -                                                         | -                             | +                                                                       | Esser (1992); Lehman (2002)               |
| <i>P. marylandicus</i>                                                             | -                                                         | -                             | +                                                                       | Esser (1992); Lehman (2002)               |
| <i>P. microdorus</i>                                                               | -                                                         | -                             | +                                                                       | Esser (1992); Lehman (2002)               |
| <i>P. mimulus</i>                                                                  | -                                                         | -                             | +                                                                       | Esser (1992); Lehman (2002)               |
| <i>P. minor</i>                                                                    | -                                                         | -                             | +                                                                       | Lehman (2002)                             |
| <i>P. minusculus</i>                                                               | +                                                         | -                             | -                                                                       | Tarjan (1960)                             |
| <i>P. minutus</i>                                                                  | +                                                         | +                             | -                                                                       | This study                                |
|                                                                                    | -                                                         | -                             | +                                                                       | Esser (1992); Lehman (2002)               |
|                                                                                    | -                                                         | +                             | +                                                                       | Singh <i>et al.</i> (2021)                |
| <i>P. nainianus</i>                                                                | -                                                         | -                             | +                                                                       | Raski (1975b)                             |
|                                                                                    |                                                           |                               |                                                                         |                                           |
| <i>P. nanus</i>                                                                    | -                                                         | -                             | +                                                                       | Lehman (2002)                             |
| <i>P. nawadus</i>                                                                  | -                                                         | -                             | +                                                                       | Lehman (2002)                             |
| <i>P. oostenbrinki</i>                                                             | -                                                         | -                             | +                                                                       | Lehman (2002)                             |
| <i>P. paralatescens</i> (in Troccoli <i>et al.</i> (2002) as <i>P. latescens</i> ) | +                                                         | +                             | -                                                                       | Troccoli <i>et al.</i> (2002)             |
|                                                                                    | +                                                         | +                             | -                                                                       | This study                                |
| <i>P. peperpotti</i>                                                               | -                                                         | -                             | +                                                                       | Esser (1992); Lehman (2002)               |
| <i>P. peraticus</i>                                                                | -                                                         | -                             | +                                                                       | Esser (1992); Lehman (2002)               |
| <i>P. perlatus</i>                                                                 | -                                                         | -                             | +                                                                       | Lehman (2002)                             |
| <i>P. pesticus</i>                                                                 | -                                                         | -                             | +                                                                       | Esser (1992); Lehman (2002)               |
| <i>P. projectus</i> (= <i>P. amblycephalus</i> )                                   | -                                                         | -                             | +                                                                       | Esser (1992); Lehman (2002)               |
| <i>P. roboris</i> sp. n.                                                           | +                                                         | +                             | -                                                                       | This study                                |

|                         |   |   |   |                             |
|-------------------------|---|---|---|-----------------------------|
| <i>P. robustus</i>      | - | - | + | Lehman (2002)               |
| <i>P. salubris</i>      | - | - | + | Lehman (2002)               |
| <i>P. sarissus</i>      | + | - | - | Tarjan (1960)               |
|                         | - | - | + | Esser (1992)                |
| <i>P. sheri</i>         | - | - | + | Lehman (2002)               |
| <i>P. straeleni</i>     | + | + | - | This study                  |
|                         | - | - | + | Lehman (2002)               |
| <i>P. vandenbrandei</i> | - | - | + | Esser (1992); Lehman (2002) |
| <i>P. yokooi</i>        | - | - | + | Lehman (2002)               |

**Table S2.** Morphometrics of *Paratylenchus aquaticus* from the original description in Ivory Coast, compared to those of a population of *P. aquaticus sensu lato* from Mexico (Brzeski, 1995) and another from Kansas (classified as type B in Van den Berg *et al.*, 2014).

| Population                                      | Paratypes<br>Ivory Coast |                  | <i>P. aquaticus</i><br>Mexico |           | <i>P. aquaticus</i> type B<br>Kansas |
|-------------------------------------------------|--------------------------|------------------|-------------------------------|-----------|--------------------------------------|
| Character                                       | ♀ (fixed)                | ♂ (fixed)        | ♀ (fixed)                     | ♂ (fixed) | ♀ (fixed)                            |
| <i>n</i>                                        | 22                       | 4                | 31                            | ?         | 7                                    |
| L                                               | 340 (270-370)            | 300 (290-310)    | 331.0 ± 213.4 (303-390)       | -         | 301.0 ± 36.5 (272-378)               |
| Stylet length (St)                              | 16.0-20.0                | -                | 15.8 ± 0.6 (14.5-17.5)        | -         | 17.0 ± 1.0 (16.0-18.5)               |
| Conus length                                    | -                        | -                | -                             | -         | 10.0 ± 0.7 (9.0-11.0)                |
| Stylet shaft + knob height                      | -                        | -                | -                             | -         | 7.0 ± 0.8 (6.0-8)                    |
| Knob width                                      | -                        | -                | -                             | -         | 3.0 ± 0.5 (3.0-3.5)                  |
| Knob height                                     | -                        | -                | -                             | -         | 2.0 ± 0.3 (1.5-2.0)                  |
| DGO                                             | 4.0-8.0                  | -                | -                             | -         | 3.5 ± 0.3 (3.0-3.5)                  |
| Median bulb valve length                        | -                        | -                | -                             | -         | -                                    |
| Median bulb width                               | -                        | -                | -                             | -         | -                                    |
| Isthmus length                                  | -                        | -                | -                             | -         | -                                    |
| Pharynx length                                  | 85.4                     | 62.0             | -                             | -         | 71.0 ± 4.4 (66.0-78.0)               |
| Anterior end to excretory pore (Ep)             | -                        | -                | 71.0 ± 4.2 (64.0-81.0)        | -         | 62.5 ± 4.7 (58.0-72.0)               |
| Max body width                                  | 12.1                     | 11.1             | -                             | -         | 14.5 ± 2.2 (11.0-17.0)               |
| Body width at vulva                             | -                        | -                | -                             | -         | -                                    |
| Body width at anus                              | -                        | -                | -                             | -         | -                                    |
| Anterior end to median bulb base                | -                        | -                | -                             | -         | -                                    |
| Lateral field width                             | -                        | -                | -                             | -         | 2.5 ± 0.2 (2.0-2.5)                  |
| Anterior end-vulva distance                     | -                        | -                | -                             | -         | -                                    |
| Vulva-tail terminus distance                    | -                        | -                | -                             | -         | -                                    |
| Genital tract length                            | -                        | -                | -                             | -         | -                                    |
| Vulva-anus distance                             | -                        | -                | -                             | -         | 30.5 ± 11.3 (29.5-35.5)              |
| Tail length                                     | 20.0-24.0                | 21.0-23.0        | -                             | -         | 23.5 ± 1.9 (22.0-26.5)               |
| Stylet base (Stb) to median bulb valve base (v) | -                        | -                | -                             | -         | -                                    |
| Spicule length                                  | -                        | 21.0-22.0        | -                             | 16.0-18.0 | -                                    |
| Gubernaculum length                             | -                        | -                | -                             | 3.0-4.0   | -                                    |
| PERCENTAGES                                     |                          |                  |                               |           |                                      |
| V                                               | 79.0-84.0                | -                | 81.3 ± 0.9 (79.0-84.0)        | -         | 80.5 ± 1.1 (79.5-82.5)               |
| G or T                                          | 23.0-31.0                | -                | -                             | -         | -                                    |
| Stb-v/St                                        | -                        | -                | -                             | -         | -                                    |
| St/L                                            | -                        | -                | -                             | -         | -                                    |
| Ep/L                                            | -                        | -                | 21.5 ± 0.8 (18.5-23.5)        | -         | 20.9 ± 1.2 (19.1-22.2)               |
| RATIOS                                          |                          |                  |                               |           |                                      |
| <i>a</i>                                        | 30.0 (26.0-39.0)         | 28.0 (26.0-30.0) | 32.1 ± 2.0 (27-35)            | -         | 20.9 ± 2.5 (18.5-35.7)               |
| <i>b</i>                                        | 4.1 (3.5-4.7)            | 4.9 (4.8-5.0)    | 3.9 ± 0.3 (3.5-4.8)           | -         | 4.2 ± 0.5 (3.6-4.8)                  |
| <i>c</i>                                        | 15.0 (14.0-18.0)         | 14.0 (13.0-15.0) | 15.3 ± 1.3 (13.2-18.0)        | -         | 12.8 ± 0.9 (11.3-14.3)               |
| <i>c'</i>                                       | -                        | -                | 3.1 ± 0.3 (2.6-3.7)           | -         | 2.8 ± 0.3 (2.4-3.1)                  |

**Table S3.** Morphometrics of males and J2 of *Paratylenchus goldeni* associated with *Zoysia* sp. in Florida.

| Population                                      | Madison, Madison County (CD3651 – N21-01426-4) |           |                            |
|-------------------------------------------------|------------------------------------------------|-----------|----------------------------|
| Character                                       | ♂ (live)                                       | ♂ (fixed) | J2 (live)                  |
| <i>n</i>                                        | 5                                              | 1         | 3                          |
| L                                               | 405 ± 34.1 (341.5-439.5)                       | 356.5     | 316.1 ± 16.9 (279.9-338.6) |
| Stylet length (St)                              | -                                              | -         | 21.1 ± 0.4 (20.7-21.7)     |
| Conus length                                    | -                                              | -         | 13.2 ± 0.5 (12.8-13.9)     |
| Stylet shaft + knob height                      | -                                              | -         | 7.9 ± 0.0 (7.9-7.8)        |
| Knob width                                      | -                                              | -         | 3.7 ± 0.9 (3.5-3.8)        |
| Knob height                                     | -                                              | -         | 1.7 ± 0.1 (1.6-1.8)        |
| DGO                                             | -                                              | -         | 5.4 ± 0.3 (5.0-7.8)        |
| Median bulb valve length                        | -                                              | -         | 5.8 ± 0.3 (5.4-6.1)        |
| Median bulb width                               | -                                              | -         | 9.9 ± 0.0 (9.9-9.9)        |
| Isthmus length                                  | -                                              | -         | 15.4 ± 0.6 (15.0-16.3)     |
| Pharynx length                                  | 95.0 ± 5.5 (85.1-102.0)                        | ?         | 94.7 ± 6.1 (89-103.2)      |
| Anterior end to excretory pore (Ep)             | 83.3 ± 7.3 (72.0-91.5)                         | ?         | 73.7 ± 1.5 (72.2-75.2)     |
| Max body width                                  | 13.9 ± 0.7 (12.8-14.7)                         | 12.0      | 16.0 ± 0.6 (15.5-16.8)     |
| Body width at anus                              | 10.4 ± 0.5 (9.9-10.8)                          | 8.5       | 10.5 ± 0.2 (10.3-10.7)     |
| Anterior end to median bulb base                | -                                              | -         | 57.6 ± 3.5 (54.0-62.3)     |
| Genital tract length                            | 121.4 ± 12.4 (105.0-142.5)                     | 73.0      | -                          |
| Tail length                                     | 44.4 ± 5.4 (38.0-50.4)                         | 43.0      | 30.6 ± 0.1 (30.5-30.6)     |
| Stylet base (Stb) to median bulb valve base (v) | -                                              | -         | 27.5 ± 2.2 (24.7-30.2)     |
| Spicule length                                  | 20.4 ± 0.7 (19.5-21.2)                         | 19.5      | -                          |
| Gubernaculum length                             | 4.0 ± 0.3 (3.5-4.5)                            | 3.5       | -                          |
| PERCENTAGES                                     |                                                |           |                            |
| G or T                                          | 30.1 ± 3.3 (24.5-33.9)                         | 20.5      | -                          |
| St/L                                            | -                                              | -         | 1.3 ± 0.1 (1.2-1.4)        |
| Ep/L                                            | 21.6 ± 1.1 (20.7-23.8)                         | ?         | 24.2 ± 0.0 (24.1-24.2)     |
| RATIOS                                          |                                                |           |                            |
| <i>a</i>                                        | 29.1 ± 1.3 (26.6-30.3)                         | 29.7      | 19.7 ± 1.7 (17.7-21.8)     |
| <i>b</i>                                        | 4.2 ± 0.1 (4.0-4.3)                            | ?         | 3.3 ± 0.1 (3.2-3.5)        |
| <i>c</i>                                        | 9.1 ± 0.7 (8.5-10.6)                           | 8.3       | 9.9 ± 0.2 (9.7-10.1)       |
| <i>c'</i>                                       | 4.1 ± 0.3 (3.8-4.6)                            | 5.1       | 2.9 ± 0.1 (2.8-2.9)        |

**Table S4.** Morphometrics of *Paratylenchus minutus* (paratypes) and paratypes of the closely related species *P. shenzhenensis* Wang, Xie, LI, Xu Yu & Wang, 2013 from China.

| Population                          | Linford <i>et al.</i> (1949). Values in bold from Raski (1975) |                         | Paratypes of <i>Paratylenchus shenzhenensis</i> Wang <i>et al.</i> (2013)<br>China |                          |
|-------------------------------------|----------------------------------------------------------------|-------------------------|------------------------------------------------------------------------------------|--------------------------|
| Character                           | ♀ (fixed)                                                      | ♂ (fixed)               | ♀ (fixed)                                                                          | ♂ (fixed)                |
| <i>n</i>                            | 17                                                             | 3                       | 41                                                                                 | 22                       |
| L                                   | 267.0 (240.0-310.0)                                            | 258.0 (220.0-270.0)     | 275.0 ± 11.9 (249.0-302.0)                                                         | 262 ± 12.2 (236.0-280.0) |
| Stylet length (St)                  | (16.0-21.0)                                                    | -                       | 19.0 ± 0.7 (17.0-21.0)                                                             | -                        |
| Conus length                        | -                                                              | -                       | 12.0 ± 0.6 (11.0-14.0)                                                             | -                        |
| Stylet shaft + knob height          | <b>11.0 (10.0-12.0)</b>                                        | -                       | 6.0 ± 0.4 (5.0-7.0)                                                                | -                        |
| Knob width                          | -                                                              | -                       | 2.0 ± 0.3 (2.0-3.0)                                                                | -                        |
| Knob height                         | -                                                              | -                       | 1.5 ± 0.2 (1.0-2.0)                                                                | -                        |
| DGO                                 | -                                                              | -                       | 3.0 ± 0.6 (2.0-4.0)                                                                | -                        |
| Median bulb valve length            | -                                                              | -                       | 5.0 ± 0.7 (4.0-7.0)                                                                | -                        |
| Isthmus length                      | -                                                              | -                       | 11.0 ± 1.3 (8.0-16.0)                                                              | -                        |
| Pharynx length                      | <b>64</b>                                                      | -                       | 68.0 ± 0.3 (60.0-72.0)                                                             | -                        |
| Anterior end to excretory pore (Ep) | <b>56.0 (49.0-59.0)</b>                                        | <b>54.0 (49.0-59.0)</b> | 63.0 ± 2.3 (59.0-68.0)                                                             | 58.0 ± 2.7 (53.0-63.0)   |
| Max body width                      | <b>15</b>                                                      | -                       | 13.0 ± 1.3 (10.0-15.0)                                                             | 9.0 ± 0.5 (8.0-10.0)     |
| Lateral field width                 | -                                                              | -                       | 2.0 ± 0.1 (1.5-2.0)                                                                | -                        |
| Anterior end-vulva distance         | <b>224</b>                                                     | -                       | 226.0 ± 9.7 (207.0-250.0)                                                          | -                        |
| Vulva-tail terminus distance        | <b>46</b>                                                      | -                       | -                                                                                  | -                        |
| Genital tract length                | <b>127</b>                                                     | -                       | -                                                                                  | -                        |
| Vulva-anus distance                 | <b>29</b>                                                      | -                       | -                                                                                  | -                        |
| Tail length                         | <b>17</b>                                                      | (14.0-19.0)             | 18.0 ± 2.0 (15.0-24.0)                                                             | 16.0 ± 1.1 (15.0-19.0)   |
| Spicule length                      | -                                                              | (16.0-19.0)             | -                                                                                  | 17.0 ± 0.7 (16.0-19.0)   |
| Gubernaculum length                 | -                                                              | <b>3.0 (2.0-4.0)</b>    | -                                                                                  | 3.0 ± 0.4 (2.0-4.0)      |
| PERCENTAGES                         |                                                                |                         |                                                                                    |                          |
| <i>V</i>                            | (80.0-84.0)                                                    | -                       | 82.2 ± 0.8 (79.6-84.2)                                                             | -                        |
| G or T                              | -                                                              | <b>30.0 (24.0-33.0)</b> | -                                                                                  | 29.1 ± 3.3 (20.7 -34.0)  |
| St/L                                | -                                                              | -                       | 6.8 ± 0.3 (6.1-7.9)                                                                | -                        |
| Ep/L                                | -                                                              | -                       | 22.8 ± 0.8 (21.4-24.6)                                                             | 22.1 ± 0.8 (20.5-23.4)   |
| RATIOS                              |                                                                |                         |                                                                                    |                          |
| <i>a</i>                            | 19.1 (16.0-24.0)                                               | 24.4 (22.0-27.0)        | 22.2 ± 2.6 (17.4-28.1)                                                             | 29.0 ± 2.1 (25.0-33.9)   |
| <i>b</i>                            | 3.7 (3.4-4.1)                                                  | 3.8 (3.5-4.1)           | 4.0 ± 0.2 (3.7-4.4)                                                                | -                        |
| <i>c</i>                            | (12.0-18.0)                                                    | 14.4 (12.0-19.0)        | 15.5 ± 1.5 (11.5-18.8)                                                             | 16.1 ± 0.8 (14.8-17.7)   |
| <i>c'</i>                           | -                                                              | -                       | 2.5 ± 0.3 (2.0-3.2)                                                                | 2.3 ± 0.2 (2.0 -2.7)     |

**Table S5.** Morphometrics of females of *Paratylenchus paralatescens* paratypes Munawar *et al.* (2018) from an undefined bamboo from China compared to those reported for *P. latescens* Raski (1976) from mesquite in Texas.

| Population                          | Unspecified bamboo (as <i>P. paralatescens</i> )<br>Munawar <i>et al.</i> (2018) China | <i>Prosopis</i> sp.<br>(as <i>P. latescens</i> )<br>Raski (1976) Texas |
|-------------------------------------|----------------------------------------------------------------------------------------|------------------------------------------------------------------------|
| Character                           | ♀ (fixed)                                                                              | ♀ (fixed)                                                              |
| <i>n</i>                            | 26                                                                                     | 19                                                                     |
| L                                   | 290.4 ± 11.8 (271.1-308.1)                                                             | 270.0 ± 16.9 (220.0-290.0)                                             |
| Stylet length (St)                  | 74.8 ± 2.4 (71.5-78.8)                                                                 | 75.0 (63.0-80.0)                                                       |
| Conus length                        | -                                                                                      | 67.0 (58.0-74.0)                                                       |
| Stylet shaft + knob height          | -                                                                                      | 7.0 (5-10)                                                             |
| Median bulb valve length            | -                                                                                      | 9.0                                                                    |
| Median bulb width                   | 7.5 ± 0.6 (6.2-8.6)                                                                    | -                                                                      |
| Isthmus length                      | -                                                                                      | 11.0                                                                   |
| Pharynx length                      | 125.6 ± 4.6 (118.7-133.5)                                                              | -                                                                      |
| Anterior end to excretory pore (Ep) | 68.8 ± 2.8 (62.7-73.4)                                                                 | 71.0 (64.0-82.0)                                                       |
| Max body width                      | 11.5 ± 0.7 (10.3-12.7)                                                                 | -                                                                      |
| Body width at vulva                 | 10.9 ± 0.6 (9.7-12.5)                                                                  | -                                                                      |
| Body width at anus                  | 5.9 ± 0.5 (5.0-6.8)                                                                    | -                                                                      |
| Vulva-tail terminus distance        | 80.5 ± 3.4 (55.5-109.0)                                                                | -                                                                      |
| Tail length                         | 26.2 ± 2.5 (21.3-30.5)                                                                 | -                                                                      |
| PERCENTAGES                         |                                                                                        |                                                                        |
| <i>V</i>                            | 70.1 ± 1.2 (68.2-72.9)                                                                 | 71.0 (68.0-73.0)                                                       |
| RATIOS                              |                                                                                        |                                                                        |
| <i>a</i>                            | 25.3 ± 1.7 (22.4 -29.0)                                                                | 19.0 (14.0-23.0)                                                       |
| <i>b</i>                            | 2.3 ± 0.1 (2.2-2.5)                                                                    | 2.2 (1.7-2.5)                                                          |
| <i>c</i>                            | 11.2 ± 1.1 (9.3-13.8)                                                                  | 13.0 (10-13)                                                           |
| <i>c'</i>                           | 4.5 ± 0.4 (3.2-5.4)                                                                    | -                                                                      |

**Table S6.** Morphometrics of males of *Paratylenchus paralatescens* populations from *Phyllostachys nigra* (Florida), *Phyllostachys bambusoides* (Florida) Troccoli *et al.* (2002) and *P. paralatescens* paratypes Munawar *et al.* (2018) from an undefined bamboo from China compared to those reported for *P. latescens* Raski (1976) from mesquite in Texas.

| Population                          | <i>Phyllostachys nigra</i><br>(CD3396 – N20-01262-1)<br>Florida |              | <i>Phyllostachys bambusoides</i><br>(as <i>P. latescens</i> )<br>Troccoli <i>et al.</i> (2002)<br>Florida | Unspecified bamboo<br>(as <i>P. paralatescens</i> )<br>Munawar <i>et al.</i> (2018)<br>China | <i>Prosopis</i> sp.<br>(as <i>P. latescens</i> )<br>Raski (1976)<br>Texas |
|-------------------------------------|-----------------------------------------------------------------|--------------|-----------------------------------------------------------------------------------------------------------|----------------------------------------------------------------------------------------------|---------------------------------------------------------------------------|
| Character                           | ♂ (live)                                                        | ♂ (fixed)    | ♂ (fixed)                                                                                                 | ♂ (fixed)                                                                                    | ♂ (fixed)                                                                 |
| <i>n</i>                            | 4                                                               | 2            | 7                                                                                                         | 4                                                                                            | 8                                                                         |
| L                                   | 305.1 ± 13.2 (287.0-318.7)                                      | 293.0, 322.0 | 298.0 ± 24.9 (278.0-348.0)                                                                                | 312.8 ± 12.4 (300.3-324.3)                                                                   | 290.0 (230.0-250.0)                                                       |
| Pharynx length                      | 79.3 ± 0.16 (71.0-86.1)                                         | 65.0, 82.1   | -                                                                                                         | 90.4 ± 2.4 (87.8-93.4)                                                                       | 97.2                                                                      |
| Anterior end to excretory pore (Ep) | 66.0 ± 2.9 (63.3-70.2)                                          | 66.3, 69.8   | 65.0 ± 6.9 (56.0-76.0)                                                                                    | 66.3 ± 1.9 (63.6-67.8)                                                                       | 65.0 (58.0-77.0)                                                          |
| Max body width                      | 11.9 ± 0.7 (10.8-12.6)                                          | 10.3, 12.4   | 10.5 ± 0.5 (10.0-11.5)                                                                                    | 10.4 ± 0.4 (10.1-10.9)                                                                       | 12.0                                                                      |
| Body width at anus                  | 9.1 ± 0.5 (8.5-9.9)                                             | 8.4, 8.4     | 7.5 ± 0.3 (7.5-8.0)                                                                                       | 8.0 ± 0.7 (7.4-8.8)                                                                          | -                                                                         |
| Lateral field width                 | 1.9 ± 0.0 (1.8-1.9)                                             | 1.9, 1.8     | -                                                                                                         | -                                                                                            | -                                                                         |
| Genital tract length                | 112.4 ± 4.0 (108.0-116.8)                                       | 136.6, 136.6 | 118.0 ± 1.9 (111.0-124.0)                                                                                 | -                                                                                            | (40.0-49.0)                                                               |
| Tail length                         | 25.8 ± 1.9 (23.2-27.7)                                          | 22.7, 27.0   | 26.5 ± 2.2 (24.0-30.5)                                                                                    | 28.2 ± 1.5 (26.7-29.5)                                                                       | 26.9                                                                      |
| Gubernaculum length                 | 4.1 ± 0.2 (4.0-4.4)                                             | 4.2, 4.0     | 4.5 ± 0.2 (4.5-5.0)                                                                                       | 4.5 ± 0.6 (4.0-5.3)                                                                          | 4.0                                                                       |
| Spicule length                      | 18.4 ± 0.4 (18.0-18.8)                                          | 18.0, 17.9   | 18.5 ± 0.7 (18.0-19.5)                                                                                    | 18.1 ± 0.7 (17.5-18.9)                                                                       | (40.0-49.0)                                                               |
| PERCENTAGES                         |                                                                 |              |                                                                                                           |                                                                                              |                                                                           |
| G or T                              | 36.8 ± 1.7 (34.3-38.8)                                          | 47.3, 42.4   | 39.3 ± 2.8 (35.6-42.8)                                                                                    | 31.5 ± 5.3 (23.8-35.7)                                                                       | 37.0 (27.0-47.0)                                                          |
| Ep/L                                | 21.6 ± 1.0 (20.0-22.5)                                          | 22.6, 21.0   | -                                                                                                         | -                                                                                            | -                                                                         |
| RATIOS                              |                                                                 |              |                                                                                                           |                                                                                              |                                                                           |
| <i>a</i>                            | 25.7 ± 0.7 (24.8-26.5)                                          | 28.4, 25.9   | 28.6 ± 0.9 (27.6-30.3)                                                                                    | 30.2 ± 2.0 (27.6 -32.1)                                                                      | 26.0 (20.0-29.0)                                                          |
| <i>b</i>                            | 3.8 ± 0.1 (3.7-4.0)                                             | 4.5, 3.9     | -                                                                                                         | 3.5 ± 5.3 (3.3-3.7)                                                                          | 3.5 (3.3-3.7)                                                             |
| <i>c</i>                            | 11.8 ± 0.4 (11.4-12.3)                                          | 12.5, 11.1   | 11.5 ± 0.7 (10.5-12.6)                                                                                    | 11.1 ± 0.8 (10.3-12.1)                                                                       | 12.0 (11.0-13.0)                                                          |
| <i>c'</i>                           | 3.8 ± 0.1 (3.7-4.0)                                             | 2.7, 3.4     | 3.4 ± 0.3 (3.0-3.8)                                                                                       | 3.6 ± 0.3 (3.3-4.0)                                                                          | -                                                                         |

**Table S7.** Reference sequences of *Paratylenchus* species used in the present study.

| Species                  | Original species description reference | Type locality / host                                        | Accession number of reference sequences |                   |                                       | Comments                                                                                                                                                                                                                                                                                                                                                                      |
|--------------------------|----------------------------------------|-------------------------------------------------------------|-----------------------------------------|-------------------|---------------------------------------|-------------------------------------------------------------------------------------------------------------------------------------------------------------------------------------------------------------------------------------------------------------------------------------------------------------------------------------------------------------------------------|
|                          |                                        |                                                             | D2-D3 of 28S rRNA gene                  | ITS rRNA gene     | COI gene                              |                                                                                                                                                                                                                                                                                                                                                                               |
| <i>P. aciculus</i>       | Brown (1959)                           | Canada, Ontario, Blackburn / fowl bluegrass                 | MZ265071                                | MZ265008          | MZ262212                              | Specimens collected from Jaén, Spain in <i>Pinus halepensis</i> , identified as <i>P. aciculus</i> were morphologically and molecularly characterized by Clavero-Camacho <i>et al.</i> (2021). <b>Molecular characterization of specimens collected from type host and locality is required.</b>                                                                              |
| <i>P. acti</i>           | Eroshenko (1978)                       | Russia, Sakhalin Island / pine                              | OQ749957                                | OQ749711          | OQ755146                              | Specimens collected from Florida, USA in <i>Andropogon virginicus</i> , identified as <i>P. acti</i> were morphologically and molecularly characterized in this study. <b>Molecular characterization of specimens collected from type host and locality is required.</b>                                                                                                      |
| <i>P. aculentus</i>      | Brown (1959)                           | Canada, Saskatchewan, Lake Lenore / grass sod               | MW413626                                | MW413588          | MW421639                              | Specimens collected from Belgium in grasses, identified as <i>P. aculentus</i> were morphologically and molecularly characterized by Singh <i>et al.</i> (2021). <b>Molecular characterization of specimens collected from type host and locality is required.</b>                                                                                                            |
| <i>P. audriellus</i>     | Brown (1959)                           | Canada, Ontario, Orleans / white birch                      | KU291238                                | -                 | -                                     | Specimens collected Kermanshah province, Iran, identified as <i>P. audriellus</i> were morphologically and molecularly characterized by Esmaeili <i>et al.</i> (2016). <b>Molecular characterization of specimens collected from type host and locality is required.</b>                                                                                                      |
| <i>P. amundseni</i>      | Bernard (1982)                         | USA, Alaska, Adak Island, Shagak Bay / <i>Elymus mollis</i> | MZ265076                                | MZ265012          | MZ262215                              | Specimens collected from Jaén, Spain in <i>Pinus halepensis</i> , identified as <i>P. amundseni</i> were morphologically and molecularly characterized by Clavero-Camacho <i>et al.</i> (2021). <b>Molecular characterization of specimens collected from type host and locality is required.</b>                                                                             |
| <i>P. aquaticus</i>      | Merny (1966)                           | Ivory Coast, Béoumi / rice                                  | KF242241 (type B) / OQ749952 (type C)   | OQ749709 (type C) | MW411838 (type B) / OQ755157 (type C) | Specimens collected from Manhattan, Kansas identified as <i>P. aquaticus</i> type B and from Florida, USA identified as <i>P. aquaticus</i> type C were morphologically and molecularly characterized by Van den Berg <i>et al.</i> (2014) and by this study, respectively. <b>Molecular characterization of specimens collected from type host and locality is required.</b> |
| <i>P. baldaccii</i>      | Raski (1975)                           | Italy, Sicily / grape                                       | MW798290                                | MW798335          | MW797012                              | Specimens collected from Sevilla, Spain in peach, identified as <i>P. baldaccii</i> were morphologically and molecularly characterized by Clavero-Camacho <i>et al.</i> (2021). <b>Molecular characterization of specimens collected from type host and locality is required.</b>                                                                                             |
| <i>P. beltsvillensis</i> | Kantor <i>et al.</i> (2021)            | USA, Maryland, Beltsville / Virginia pine                   | MW413581                                | MW413587          | -                                     | Specimens collected from the type host and locality were morphologically and molecularly characterized by Kantor <i>et al.</i> (2021). <b>Molecular characterization of COI gene of specimens collected from type host and locality is required.</b>                                                                                                                          |
| <i>P. bilineatus</i>     | Brzeski (1995)                         | Taiwan, Shuang Hai / bamboo                                 | -                                       | EU247525          | -                                     | Specimens collected from the type host in Taiwan were morphologically and molecularly characterized by Chen <i>et al.</i> (2008). <b>Molecular characterization of 28S rRNA and COI genes of specimens collected from type host and locality is required.</b>                                                                                                                 |

|                           |                                      |                                                                 |          |          |          |                                                                                                                                                                                                                                                                                                            |
|---------------------------|--------------------------------------|-----------------------------------------------------------------|----------|----------|----------|------------------------------------------------------------------------------------------------------------------------------------------------------------------------------------------------------------------------------------------------------------------------------------------------------------|
| <i>P. borealis</i> sp. n. | This study                           | USA, Alaska, Anchorage / unknown plants                         | OQ749978 | OQ749710 | MW421700 | Specimens collected from the type host and locality were molecularly characterized in this study. <b>Molecular characterization of COI gene of specimens collected from type host and locality is required.</b>                                                                                            |
| <i>P. canchicus</i>       | Mohilal & Dhanachand (2004)          | India, Uttar Pradesh                                            | ON873212 | -        | ON873964 | Specimens collected from Málaga, Spain in maritimus pine, identified as <i>P. canchicus</i> were morphologically and molecularly characterized by Palomares-Rius <i>et al.</i> (2022b). <b>Molecular characterization of ITS rRNA gene of specimens collected from type host and locality is required.</b> |
| <i>P. capitatus</i>       | Adams & Eichenmuller (1962)          | USA, West Virginia / scarlet oak                                | -        | -        | MN710982 | Specimens collected North Carolina, USA, identified as <i>P. capitatus</i> were molecularly characterized by Powers <i>et al.</i> (2021). <b>Molecular characterization of specimens collected from type host and locality is required.</b>                                                                |
| <i>P. caravaquenus</i>    | Clavero-Camacho <i>et al.</i> (2021) | Spain, Murcia, Caravaca / pine                                  | MW798270 | MW798316 | MW797003 | Specimens collected from the type host and locality were morphologically and molecularly characterized by Clavero-Camacho <i>et al.</i> (2021).                                                                                                                                                            |
| <i>P. chongqingensis</i>  | Li <i>et al.</i> (2019)              | China, Chongqing / <i>Ophiopogon japonicus</i>                  | -        | MK024368 | -        | Specimens collected from the type host and locality were morphologically and molecularly characterized by Li <i>et al.</i> (2019). <b>Molecular characterization of 28S rRNA and COI genes of specimens collected from type host and locality is required.</b>                                             |
| <i>P. coronatus</i>       | Colbran (1965)                       | Australia, Queensland / <i>Baloghia lucida</i>                  | MK506808 | MK506795 | -        | Specimens collected from East Azerbaijan, Iran in <i>Crataegus</i> sp., identified as <i>P. coronatus</i> were morphologically and molecularly characterized by Mokaram Hesar <i>et al.</i> (2019). <b>Molecular characterization of specimens collected from type host and locality is required.</b>      |
| <i>P. dianthus</i>        | Jenkins & Taylor (1956)              | USA, Maryland / <i>Dianthus caryophyllus</i>                    | KF242226 | KF242271 | MW411837 | Specimens collected from Gauteng, South Africa in <i>Chrysanthemum</i> , identified as <i>P. dianthus</i> were morphologically and molecularly characterized by Van den Berg <i>et al.</i> (2014). <b>Molecular characterization of specimens collected from type host and locality is required.</b>       |
| <i>P. elachistus</i>      | Steiner (1949)                       | USA, Florida. Clewiston/ <i>Boehmeria nivea</i>                 | MW413629 | MW413590 | MW421643 | Specimens collected from Belgium in grasses, identified as <i>P. elachistus</i> were morphologically and molecularly characterized by Singh <i>et al.</i> (2021). <b>Molecular characterization of specimens collected from type host and locality is required.</b>                                        |
| <i>P. enigmaticus</i>     | Munawar <i>et al.</i> (2021)         | Canada, Alberta, Taber / potato field                           | MW282760 | MW282772 | MZ262222 | Specimens collected from the type host and locality were morphologically and molecularly characterized by Munawar <i>et al.</i> (2021). <b>Molecular characterization of COI gene of specimens collected from type host and locality is required.</b>                                                      |
| <i>P. goldeni</i>         | Raski (1975)                         | USA, North Carolina / <i>Buxus</i> sp.                          | OQ749969 | OQ749700 | OQ755152 | Specimens collected from Florida, USA in <i>Ilex</i> sp, identified as <i>P. goldeni</i> were morphologically and molecularly characterized in this study. <b>Molecular characterization of specimens collected from type host and locality is required.</b>                                               |
| <i>P. goodeyi</i>         | Ostenbrink (1953)                    | The Netherlands, Arnhem / grasses                               | MW413631 | MW413594 | MW421647 | Specimens collected from Belgium in grasses, identified as <i>P. goodeyi</i> were morphologically and molecularly characterized by Singh <i>et al.</i> (2021). <b>Molecular characterization of specimens collected from type host and locality is required.</b>                                           |
| <i>P. guangzhouensis</i>  | Wang <i>et al.</i> (2016)            | China, Guangdong Province, Guangzhou / <i>Bambusa multiplex</i> | -        | KT725625 | -        | Specimens collected from the type host and locality were morphologically and molecularly characterized by Wang <i>et al.</i> (2016). <b>Molecular characterization of 28S rRNA and COI genes of specimens collected from type host and locality is required.</b>                                           |
| <i>P. hamatus</i>         | Thorne & Allen (1950)                | USA, California / fig tree                                      | KF242212 | KF242244 | MW411821 | Specimens collected from the type host and locality were morphologically and molecularly characterized by Van den Berg <i>et al.</i> (2014).                                                                                                                                                               |
| <i>P. hamicaudatus</i>    | Cid del Prado Vera & Maggenti (1988) | USA, California, Marin County / Sequoia sempervirens            | OQ749973 | OQ749705 | OQ755158 | Specimens collected from the type host and locality were molecularly characterized in this study.                                                                                                                                                                                                          |

|                              |                                      |                                                        |          |          |          |                                                                                                                                                                                                                                                                                                                                                                                        |
|------------------------------|--------------------------------------|--------------------------------------------------------|----------|----------|----------|----------------------------------------------------------------------------------------------------------------------------------------------------------------------------------------------------------------------------------------------------------------------------------------------------------------------------------------------------------------------------------------|
| <i>P. hawaiiensis</i> sp. n. | This study                           | USA, Florida, Miami-Dade County / <i>Aechmea</i> sp.   | OQ749977 | KF242277 | MW411845 | Specimens collected from the type host and locality were molecularly characterized in this study. <b>Molecular characterization of ITS rRNA and COI genes of specimens collected from type host and locality is required.</b>                                                                                                                                                          |
| <i>P. holdemani</i>          | Raski (1975)                         | El Salvador, Santa Anna / coffee                       | MW413639 | MW413596 | MW421653 | Specimens collected from Belgium, grasses, identified as <i>P. holdemani</i> were morphologically and molecularly characterized by Singh <i>et al.</i> (2021). <b>Molecular characterization of specimens collected from type host and locality is required.</b>                                                                                                                       |
| <i>P. idalimus</i>           | Raski (1962)                         | USA, California / <i>Ericameria palmeri</i>            | KF242237 | KF242275 | MW411839 | Specimens collected from Belgium, grasses, identified as <i>P. idalimus</i> were morphologically and molecularly characterized by Singh <i>et al.</i> (2021). Specimens collected from California, USA in grape were molecularly characterized by Van den Berg <i>et al.</i> (2014). <b>Molecular characterization of specimens collected from type host and locality is required.</b> |
| <i>P. ilicis</i>             | Singh <i>et al.</i> (2022)           | The Netherlands, Hilversum / <i>Ilex aquifolium</i>    | MW413683 | ON668073 | MW421706 | Specimens collected from the type host and locality were morphologically and molecularly characterized by Singh <i>et al.</i> (2022).                                                                                                                                                                                                                                                  |
| <i>P. indalus</i>            | Clavero-Camacho <i>et al.</i> (2021) | Spain, Almería, Santa María de Nieva / almond          | MW798273 | MW798319 | MW797005 | Specimens collected from the type host and locality were morphologically and molecularly characterized by Clavero-Camacho <i>et al.</i> (2021).                                                                                                                                                                                                                                        |
| <i>P. israelensis</i>        | Raski (1973)                         | Israel, Shiller / plum                                 | MW798301 | MW798343 | MW797019 | Specimens collected from Cordoba, Spain in almond, identified as <i>P. israelensis</i> were morphologically and molecularly characterized by Clavero-Camacho <i>et al.</i> (2021). <b>Molecular characterization of specimens collected from type host and locality is required.</b>                                                                                                   |
| <i>P. jasmineae</i>          | Phani <i>et al.</i> (2019)           | India, New Delhi / <i>Jasminum sambac</i>              | MH588059 | MH588060 | -        | Specimens collected from the type host and locality were morphologically and molecularly characterized by Phani <i>et al.</i> (2019). <b>Molecular characterization of COI gene of specimens collected from type host and locality is required.</b>                                                                                                                                    |
| <i>P. labiosus</i>           | Anderson & Kimpinski (1977)          | Canada, Prince Edward Island, Souris / potato          | MK506809 | MK506796 | -        | Specimens collected from East Azerbaijan, Iran in <i>Malus</i> sp., identified as <i>P. labiosus</i> were morphologically and molecularly characterized by Mokaram Hesar <i>et al.</i> (2019). <b>Molecular characterization of specimens collected from type host and locality is required.</b>                                                                                       |
| <i>P. lepidus</i>            | Raski (1975)                         | Sri Lanka / <i>Thea sinensis</i>                       | MK886692 | MK886695 | MT828831 | Specimens collected from Zhejiang Province, China in <i>Elaeocarpus</i> sp. identified as <i>P. lepidus</i> were morphologically and molecularly characterized by Munawar <i>et al.</i> (2019). <b>Molecular characterization of specimens collected from type host and locality is required.</b>                                                                                      |
| <i>P. leptos</i>             | Raski (1975)                         | Brazil, Nova Teutonia / <i>Piper</i> sp.               | MW413645 | -        | MW421663 | Specimens collected from Gera district, Ethiopia in coffee, identified as <i>P. leptos</i> were molecularly characterized by Singh <i>et al.</i> (2021). <b>Molecular characterization of specimens collected from type host and locality is required.</b>                                                                                                                             |
| <i>P. macrodorus</i>         | Brzeski (1963)                       | Poland, Skierniewice / <i>Cichorium intybus</i>        | MZ265108 | MZ265034 | MZ262239 | Specimens collected from Córdoba, Spain in wild olive, identified as <i>P. macrodorus</i> were morphologically and molecularly characterized by Clavero-Camacho <i>et al.</i> (2021). <b>Molecular characterization of specimens collected from type host and locality is required.</b>                                                                                                |
| <i>P. microdorus</i>         | Andrássy (1959)                      | Montenegro, Durmitor mountains / grasses               | MW413654 | MW413598 | MW421666 | Specimens collected from Belgium in grasses identified as <i>P. microdorus</i> were morphologically and molecularly characterized by Singh <i>et al.</i> (2021). <b>Molecular characterization of specimens collected from type host and locality is required.</b>                                                                                                                     |
| <i>P. minor</i>              | Sharma <i>et al.</i> (1986)          | India, Himachal Pradesh, Juneo / <i>Prunus persica</i> | MK660188 | MK660189 | -        | Specimens collected from Zhejiang Province, China in <i>Pinus tabulaeformis</i> identified as <i>P. minor</i> were morphologically and molecularly characterized by Munawar <i>et al.</i> (2019). <b>Molecular characterization of specimens collected from type host and locality is required.</b>                                                                                    |

|                            |                                      |                                                            |          |          |          |                                                                                                                                                                                                                                                                                                              |
|----------------------------|--------------------------------------|------------------------------------------------------------|----------|----------|----------|--------------------------------------------------------------------------------------------------------------------------------------------------------------------------------------------------------------------------------------------------------------------------------------------------------------|
| <i>P. minutus</i>          | Linford <i>et al.</i> (1949)         | USA, Hawaii, Oahu, Wahiawa / <i>Ananas comosus</i>         | OQ749976 | OQ749706 | -        | Specimens collected from Hawaii, USA in <i>Coffea</i> sp., identified as <i>P. minutus</i> were morphologically and molecularly characterized in this study. <b>Molecular characterization of COI gene of specimens collected from type host and locality is required.</b>                                   |
| <i>P. nainianus</i>        | Edward & Misra (1963)                | India, Uttar Pradesh / <i>Psidium cattleianum</i>          | ON873217 | ON873186 | ON873966 | Specimens collected from Málaga, Spain in green heather, identified as <i>P. nainianus</i> were morphologically and molecularly characterized by Palomares-Rius <i>et al.</i> (2022b)                                                                                                                        |
| <i>P. nanjingensis</i>     | Wang <i>et al.</i> (2016)            | China, Jiangsu Province, Nanjing / <i>Pinus massoniana</i> | KR232932 | KM366101 | -        | Specimens collected from the type host and locality were morphologically and molecularly characterized by Wang <i>et al.</i> (2016). <b>Molecular characterization of COI gene of specimens collected from type host and locality is required.</b>                                                           |
| <i>P. nanus</i>            | Cobb (1923)                          | USA, Virginia / grasses                                    | MW234450 | MW234452 | MW238474 | Specimens collected from the type host and locality were morphologically and molecularly characterized by Subbotin <i>et al.</i> (2020).                                                                                                                                                                     |
| <i>P. nawadus</i>          | Khan <i>et al.</i> (1967)            | India, Bihar / <i>Carissa</i> sp.                          | MN088373 | -        | -        | Specimens collected from Behbahan, Khuzestan, Iran in <i>Gundelia tournefortii</i> identified as <i>P. nawadys</i> were morphologically and molecularly characterized by Mirbabaie <i>et al.</i> (2019). <b>Molecular characterization of specimens collected from type host and locality is required.</b>   |
| <i>P. neoamblycephalus</i> | Geraert (1965)                       | Germany, Frauweiler / <i>Malus</i>                         | MW413660 | MW413606 | MW421675 | Specimens collected from Belgium in cypress tree identified as <i>P. neoamblycephalus</i> were morphologically and molecularly characterized by Singh <i>et al.</i> (2021). <b>Molecular characterization of specimens collected from type host and locality is required.</b>                                |
| <i>P. neonanus</i>         | Mathur <i>et al.</i> (1967)          | India, Uttar Pradesh, Meerut / <i>Ziziphus</i> sp.         | ON873226 | -        | ON873976 | Specimens collected from Málaga, Spain in maritimus pine, identified as <i>P. neonanus</i> were morphologically and molecularly characterized by Palomares-Rius <i>et al.</i> (2022b) <b>Molecular characterization of specimens collected from type host and locality is required.</b>                      |
| <i>P. neoprojectus</i>     | Wu & Hawn (1975)                     | Canada, Alberta / alfalfa                                  | MW282762 | MW282775 | -        | Specimens collected from Alberta, Canada in <i>Chenopodium</i> sp., identified as <i>P. neoprojectus</i> were morphologically and molecularly characterized by Munawar <i>et al.</i> (2021). <b>Molecular characterization of COI gene of specimens collected from type host and locality is required.</b>   |
| <i>P. pandatus</i>         | Raski (1976)                         | Nigeria, Katsina / grapefruit                              | MZ265116 | MZ265041 | MZ262247 | Specimens collected from Caravaca, Murcia, Spain in <i>Pinus halepensis</i> , identified as <i>P. pandatus</i> were morphologically and molecularly characterized by Clavero-Camacho <i>et al.</i> (2021). <b>Molecular characterization of specimens collected from type host and locality is required.</b> |
| <i>P. paraaonli</i>        | Palomares-Rius <i>et al.</i> (2022b) | Spain, Málaga, Casares/ maritimus pine                     | ON873200 | ON873174 | ON873946 | Specimens collected from the type host and locality were morphologically and molecularly characterized by Palomares-Rius <i>et al.</i> (2022b)                                                                                                                                                               |
| <i>P. paralatescens</i>    | Munawar <i>et al.</i> (2018)         | China, Zhejiang Province, Anji County / bamboo trees       | MH200616 | MH200615 | -        | Specimens collected from the type host and locality were morphologically and molecularly characterized by Munawar <i>et al.</i> (2018). <b>Molecular characterization of COI gene of specimens collected from type host and locality is required.</b>                                                        |
| <i>P. parastraeleni</i>    | Clavero-Camacho <i>et al.</i> (2021) | Spain, Jaén, Arroyo Frío / <i>Quercus faginea</i>          | MZ265064 | MZ265004 | MZ262208 | Specimens collected from the type host and locality were morphologically and molecularly characterized by Clavero-Camacho <i>et al.</i> (2021).                                                                                                                                                              |
| <i>P. pedrami</i>          | Clavero-Camacho <i>et al.</i> (2021) | Spain, Córdoba / almond                                    | MW798283 | MW798329 | MW797009 | Specimens collected from the type host and locality were morphologically and molecularly characterized by Clavero-Camacho <i>et al.</i> (2021).                                                                                                                                                              |
| <i>P. peraticus</i>        | Raski (1962)                         | Germany, Rehlinger Trausch / grapes                        | MK506805 | MK506792 | -        | Specimens collected from Ardebil, Iran in <i>Prunus</i> sp., identified as <i>P. peraticus</i> were morphologically and molecularly characterized by Mokaram Hesar <i>et al.</i> (2019). <b>Molecular characterization of specimens collected from type host and locality is required.</b>                   |
| <i>P. pestis</i>           | Thorne (1943)                        | USA, California, Santa Clara / <i>Juglans regia</i>        | MK506802 | MK506790 | -        | Specimens collected from East Azerbaijan, Iran in <i>Juglans regia</i> , identified as <i>P. pestis</i> were morphologically and molecularly characterized by Mokaram Hesar <i>et</i>                                                                                                                        |

|                           |                                      |                                                        |          |          |          |                                                                                                                                                                                                                                                                                                                                                            |
|---------------------------|--------------------------------------|--------------------------------------------------------|----------|----------|----------|------------------------------------------------------------------------------------------------------------------------------------------------------------------------------------------------------------------------------------------------------------------------------------------------------------------------------------------------------------|
|                           |                                      |                                                        |          |          |          | <i>al.</i> (2019). <b>Molecular characterization of specimens collected from type host and locality is required.</b>                                                                                                                                                                                                                                       |
| <i>P. plesiostraeleni</i> | Palomares-Rius <i>et al.</i> (2022b) | Spain, Málaga, Tolox,                                  | ON873204 | ON873179 | ON873954 | Specimens collected from the type host and locality were morphologically and molecularly characterized by Palomares-Rius <i>et al.</i> (2022b)                                                                                                                                                                                                             |
| <i>P. projectus</i>       | Jenkins (1956)                       | USA, Maryland, Upper Marlboro / grass                  | MT668712 | MT668705 | MW238473 | Specimens collected from California, North Dakota, USA and South Africa identified as <i>P. projectus</i> were morphologically and molecularly characterized by Van den Berg <i>et al.</i> (2014) and Subbotin <i>et al.</i> (2020). Molecular characterization of specimens collected from type host and locality is required.                            |
| <i>P. recisus</i>         | Siddiqi (1996)                       | Carimagua, Colombia / <i>Stylosanthes guianensis</i>   | MZ265119 | MZ265043 | MZ262252 | Specimens collected from Jaén, Spain in <i>Quercus faginea</i> , identified as <i>P. recisus</i> were morphologically and molecularly characterized by Clavero-Camacho <i>et al.</i> (2021). <b>Molecular characterization of specimens collected from type host and locality is required.</b>                                                             |
| <i>P. roboris</i> sp. n.  | This study                           | USA, Florida / <i>Quercus virginiana</i>               | OQ749956 | OQ749714 | OQ755148 | Specimens collected from the type host and locality were morphologically and molecularly characterized in this study.                                                                                                                                                                                                                                      |
| <i>P. rostrocaudatus</i>  | Huang & Raski (1987)                 | Brazil, Fazenda Sossego / rice                         | KR270601 | KR270604 | -        | Specimens collected from China in bamboo, identified as <i>P. rostrocaudatus</i> were morphologically and molecularly characterized by Zhuo <i>et al.</i> (2018). <b>Molecular characterization of specimens collected from type host and locality is required.</b>                                                                                        |
| <i>P. salubris</i>        | Raski (1975b)                        | Brazil, Porto Seguro / <i>Theobroma cacao</i>          | ON873233 | -        | ON873980 | Specimens collected from Málaga, Spain in maritimus pine, identified as <i>P. salubris</i> were morphologically and molecularly characterized by Palomares-Rius <i>et al.</i> (2022b). <b>Molecular characterization of specimens collected from type host and locality is required.</b>                                                                   |
| <i>P. sheri</i>           | Raski (1973)                         | France, Digne / grasses                                | MZ265121 | MZ265044 | MZ262253 | Specimens collected from Jaén, Spain in grasses, identified as <i>P. sheri</i> were morphologically and molecularly characterized by Clavero-Camacho <i>et al.</i> (2021). <b>Molecular characterization of specimens collected from type host and locality is required.</b>                                                                               |
| <i>P. similis</i>         | Khan <i>et al.</i> (1967)            | India, Mysore, Dhadesugar / sorghum                    | MK506806 | MK506793 | -        | Specimens collected from East Azerbaijan, Iran in <i>Prunus</i> sp., identified as <i>P. similis</i> were morphologically and molecularly characterized by Mokaram Hesar <i>et al.</i> (2019). <b>Molecular characterization of specimens collected from type host and locality is required.</b>                                                           |
| <i>P. sinensis</i>        | Munawar <i>et al.</i> (2020)         | China Zhejiang Province, Jiaxing City / white mulberry | MN129026 | MN129021 | -        | Specimens collected from the type host and locality were morphologically and molecularly characterized by Munawar <i>et al.</i> (2020). <b>Molecular characterization of COI gene of specimens collected from type host and locality is required.</b>                                                                                                      |
| <i>P. straeleni</i>       | De Coninck (1931)                    | Belgium, Liège Province, High Fens / moss              | MW413685 | MW413624 | MW421708 | Specimens collected from California, USA and Belgium in grasses identified as <i>P. straeleni</i> were morphologically and molecularly characterized by Van den Berg <i>et al.</i> (2014) and Singh <i>et al.</i> (2021). <b>Molecular characterization of specimens collected from type host and locality is required.</b>                                |
| <i>P. tateae</i>          | Wu & Townshend (1973)                | Canada, Ontario / corn                                 | MW282754 | MW282766 | MZ262262 | Specimens collected from Southern Alberta, Canada in potato and Zaragoza, Spain in almond, identified as <i>P. tateae</i> were morphologically and molecularly characterized by Munawar <i>et al.</i> , (2021) and Clavero-Camacho <i>et al.</i> (2021). <b>Molecular characterization of specimens collected from type host and locality is required.</b> |
| <i>P. tenuicaudatus</i>   | Wu (1961)                            | Canada, Ontario, North Gowe / red clover               | MW798306 | MW798347 | MW797021 | Specimens collected from Murcia, Spain in almond, identified as <i>P. tenuicaudatus</i> were morphologically and molecularly characterized by Clavero-Camacho <i>et al.</i> (2021). <b>Molecular characterization of specimens collected from type host and locality is required.</b>                                                                      |
| <i>P. teres</i>           | Raski (1976)                         | Brazil, Espirito Santo / <i>Theobroma cacao</i>        | MN088376 | -        | -        | Specimens collected from Khuzestan, Iran in <i>Pistacia atlantica</i> , identified as <i>P. teres</i> were morphologically and molecularly characterized by Mirbabaei <i>et al.</i> (2019).                                                                                                                                                                |

|                       |                                      |                                            |          |          |          |                                                                                                                                                                                                                                                                                         |
|-----------------------|--------------------------------------|--------------------------------------------|----------|----------|----------|-----------------------------------------------------------------------------------------------------------------------------------------------------------------------------------------------------------------------------------------------------------------------------------------|
|                       |                                      |                                            |          |          |          | <b>Molecular characterization of specimens collected from type host and locality is required.</b>                                                                                                                                                                                       |
| <i>P. variabilis</i>  | Raski (1975)                         | USA, California / <i>Rhus trilobata</i>    | MZ265127 | MZ265051 | MZ262265 | Specimens collected from Cordoba, Spain in wild olive, identified as <i>P. variabilis</i> were morphologically and molecularly characterized by Clavero-Camacho <i>et al.</i> (2021). <b>Molecular characterization of specimens collected from type host and locality is required.</b> |
| <i>P. veruculatus</i> | Wu (1962)                            | Scotland, Kilmcolm / heather               | MW798311 | MW798350 | MW797027 | Specimens collected from Almería, Spain in almond, identified as <i>P. veruculatus</i> were morphologically and molecularly characterized by Clavero-Camacho <i>et al.</i> (2021). <b>Molecular characterization of specimens collected from type host and locality is required.</b>    |
| <i>P. verus</i>       | Brzeski (1995)                       | Mexico, Texcoco / forest                   | MZ265130 | MZ265054 | MZ262268 | Specimens collected from Cordoba, Spain in wild olive, identified as <i>P. verus</i> were morphologically and molecularly characterized by Clavero-Camacho <i>et al.</i> (2021). <b>Molecular characterization of specimens collected from type host and locality is required.</b>      |
| <i>P. vitecus</i>     | Pramodini <i>et al.</i> (2006)       | India, Manipur / <i>Vitex peduncularis</i> | MZ265136 | MZ265059 | MZ262272 | Specimens collected from Cordoba, Spain in wild olive, identified as <i>P. verus</i> were morphologically and molecularly characterized by Clavero-Camacho <i>et al.</i> (2021). <b>Molecular characterization of specimens collected from type host and locality is required.</b>      |
| <i>P. zurgenerus</i>  | Clavero-Camacho <i>et al.</i> (2021) | Spain, Almería, Zurgena / almond           | MW798286 | MW798331 | MW797010 | Specimens collected from the type host and locality were morphologically and molecularly characterized by Clavero-Camacho <i>et al.</i> (2021).                                                                                                                                         |
| <i>P. wuae</i>        | Yu <i>et al.</i> (2016)              | Canada, Ontario, Ottawa / cow parsnip      | KM061782 | KM061783 | -        | Specimens collected from the type host and locality were morphologically and molecularly characterized by Yu <i>et al.</i> (2016). <b>Molecular characterization of COI gene of specimens collected from type host and locality is required.</b>                                        |
